# Supplementary material
Source: Springer Nature journal article supplement (https://www.springermedizin.de/resource/supplementary/12885_2010_2253_MOESM5_ESM.pdf/9460862)

Control 1

Control 2

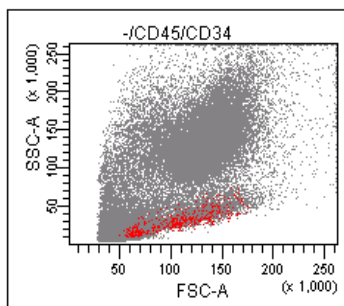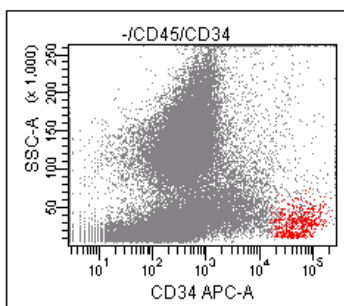

1

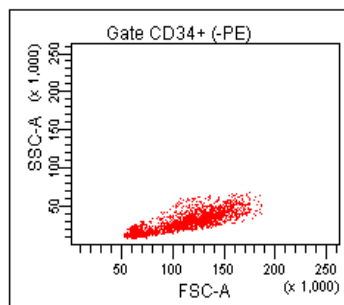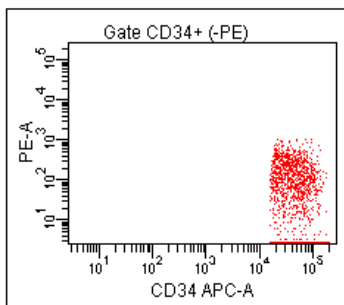

2

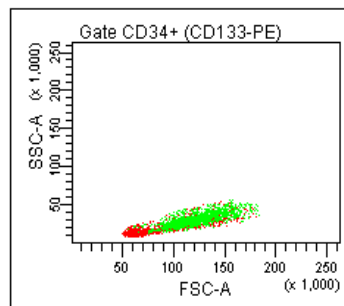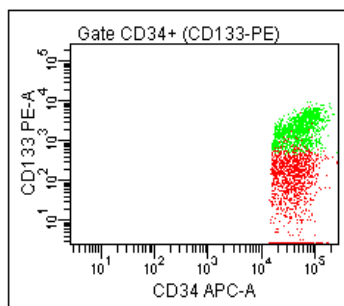

3

Supplement: MOESM5 [file 9460862]
